# Supplementary material for: Impact of osteopathic manipulative techniques on the management of dizziness caused by neuro-otologic disorders: systematic review and meta-analysis
Source: publisher site journal article supplement (doi:10.1515/jom-2022-0119), 2022-10-11
Supplement: Supplementary file 1 [file j_jom-2022-0119_suppl_001.docx]

**Supplementary Table 1.** Search Strategy Used in the Current Review

**Database: AMED (Allied and Complementary Medicine) <1985 to January 2021>**

**Search Strategy:**

1. exp Vertigo/
2. vertigo.mp.
3. vertig*.mp.
4. exp Dizziness/
5. dizz*.mp.
6. light-headedness.mp.
7. faintness.mp.
8. postural balance.mp.
9. exp Gait Disorders/
10. postural instability.mp.
11. postural control.mp.
12. disequilibrium.mp.
13. dysequilibrium.mp.
14. proprioception.mp. or exp Proprioception/
15. propriocept*.mp.
16. falls.mp.
17. exp Balance/ or exp Accidental falls/
18. exp Ataxia/ or Ataxia.mp.
19. Equilibrium.mp. or exp Balance/ or exp Posture/
20. **or/1-19**
21. exp Osteopathic Medicine/ or exp Manipulation, Osteopathic/
22. osteopathic intervention.mp.
23. osteopathic man*.mp.
24. osteopathic treatment.mp.
25. cranial osteopath*.mp.
26. High velocity low amplitude.mp.
27. HVLA.mp.
28. myofascial release.mp.
29. Soft tissue therap*.mp.
30. Soft tissue manipulation.mp.
31. shiatsu.mp.
32. acupressure.mp. or Acupressure/
33. manipulative physiotherapy.mp.
34. joint mobilization.mp.
35. exp "Range of Motion, Articular"/ or joint manipulation.mp.
36. massage.mp.
37. visceral manipulation.mp.
38. craniosacral technique.mp.
39. craniosacral manipulation.mp.
40. lumbar manipulation.mp.
41. cervical manipulation.mp.
42. exp Spinal manipulation/
43. manipulative therapy.mp.
44. manual therapy.mp. or exp Musculoskeletal Manipulations/
45. chiropractic man*.mp.
46. chiropractic treat*.mp.
47. visceral osteopath*.mp
48. **or/21-47**
49. exp Labyrinth disease/
50. Labyrinth disease.mp.
51. exp Vestibular disease/
52. vestibular disease.mp.
53. exp Tinnitus/
54. cerebellar ataxia.mp.
55. cerebellar dysfunction.mp.
56. Movement Disorders.mp.
57. exp Movement Disorders/
58. Traumatic Brain Injury.mp.
59. TBI.mp.
60. Post concussive syndrome.mp.
61. Concussion.mp.
62. exp Post-Concussion Syndrome/ or exp Brain Injuries/
63. Closed head injury.mp.
64. Head Injuries, Closed.mp. or exp Head injuries/
65. exp Parkinson disease/
66. Parkinsonian Disorders.mp.
67. Parkinsonism.mp.
68. Parkinson disease.mp. or exp Parkinson Disease/
69. Multiple Sclerosis.mp.
70. vestibulopathy.mp.
71. cervicogenic dizziness.mp.
72. cervical vertigo.mp.
73. exp Post-Concussion Syndrome/ or Cervicogenic vertigo.mp.
74. exp Brain concussion/ or exp Brain injuries/
75. Post-Concussion Syndrome.mp.
76. Cervicogenic vertigo.mp.
77. vestibular vertigo.mp.
78. BPV.mp.
79. BPPV.mp.
80. Neuritis/ or Vestibular Neuronitis.mp.
81. Benign Paroxysmal Positional Vertigo.mp.
82. Labyrinthitis.mp.
83. Meniere Disease.mp.
84. exp Menieres disease/
85. Endolymphatic Hydrops.mp.
86. Endolymphatic Hydrops.mp.
87. Vestibular apparatus.mp.
88. Ear disorders.mp.
89. **or/49-88**
90. **20 and 48 and 89**

**The Cochrane Central Register of Controlled Trials (CENTRAL):**

#1 exp falls

#2 propriocept*

#3 proprioception

#4 exp Proprioception

#5 exp dysequilibrium

#6 exp disequilibrium

#7 Equilibrium

#8 Ataxia

#9 postural control.mp.

#10 exp postural instability

#11 exp Gait Disorders, Neurologic

#12 postural balance

#13 exp Postural Balance

#14 faintness

#15 exp postural control

#16 exp light-headedness

#17 exp lightheadedness

#18 exp Dizziness

#19 dizz*

#20 Exp dizzy

#21 exp Vertigo

#22 vertig*

#23 #1 or #2 or #3 or #4 or #5 or #6 or #7 or #8 or #9 #10 or #11 or #12 or #13 or #14 or #15 or #16 or #17 or #18 or #19 or #20 or #21 or #22

#24 exp Osteopathic Medicine or exp Manipulation, Osteopathic

#25 exp osteopathic intervention

#26 osteopathic intervention

#27 osteopathic man*

#28 osteopathic treatment.mp.

#29 exp osteopathic treatment

#30 cranial osteopath*

#31 exp cranial osteopath*

#32 visceral osteopath*

#33 chiropractic treat*

#34 chiropractic man*

#35 manual therapy

#36 exp Musculoskeletal Manipulations

#37 manipulative therapy

#38 exp Manipulation, Spinal

#39 cervical manipulation

#40 lumbar manipulation

#41 craniosacral manipulation

#42 exp Spinal manipul*

#43 craniosacral technique

#44 visceral manipulation

#45 exp massage

#46 exp "Range of Motion, Articular" or joint manipulation

#47 joint mobilization

#48 manipulative physiotherapy

#49 exp acupressure. or Acupressure

#50 High velocity low amplitude

#51 HVLA

#52 shiatsu

#53 Soft tissue manipulation

#54 Soft tissue therap*

#55 myofascial release

#56 #24 or #25 or #26 or #27 or #28 or #29 or #30 or #31 or #32 or #33 or #34 or #35 or #36 or #37 or #38 or #39 or #40 or #41 or #42 or #43 or #44 or #45 or #46 or #47 or #48 or #49 or #50 or #51 or #52 or #53 or #54 or #55

#57 cerebellar ataxia

#58 cerebellar ataxi*

#59 cerebellar dysfunction

#60 Movement Disorders

#61 exp Movement Disorders

#62 Traumatic Brain Injury

#63 TBI

#64 Post concussive syndrome

#65 Concussion

#66 exp Post-Concussion Syndrome or exp Brain Injuries

#67 Closed head injury

#68 exp Head Injuries, Closed

#69 exp Parkinsonian Disorders

#70 Parkinsonism

#71 Parkinson disease or exp Parkinson Disease

#72 Multiple Sclerosis or exp Multiple Sclerosis

#73 vestibulopathy

#74 Neurotolog* or exp Neurotology

#75 neuro-otology*

#76 cervicogenic dizziness

#77 exp Cervicogenic vertigo or Cervicogenic vertigo

#78 cervical vertigo

#79 vestibular vertigo or exp vestibular vertigo

#80 BPPV or BPV

#81 exp Benign Paroxysmal Positional Vertigo or Benign Paroxysmal Positional Vertigo

#82 vestibular peripheral vertigo

#83 exp Vestibular Neuronitis or Vestibular Neuronitis

#84 exp Labyrinthitis

#85 Meniere Disease or exp Meniere Disease

#86 Endolymphatic Hydrops or exp Endolymphatic Hydrops

#87 exp Tinnitus or Tinnitus

#88 exp Ear, Inner or Ear, Inner

#89 vestibular disease

#90 exp Vestibular Diseases or Vestibular Diseases

#91 ear disorders

#92 Labyrinth disease

#93 Vestibular apparatus

#94 Labyrinthine disease or exp Labyrinth Disease

#95 #57 or #58 or #59 or #60 or #61 or #62 or #63 or #64 or #65 or #66 or #67 or #68 or #69 or #70 or #71 or #72 or #73 or #74 or #75 or #76 or #77 or #78 or #79 or #80 or #81 or #82 or #83 or #84 or #85 or #86 or #87 or #88 or #89 or #90 or #91 or #92 or #93 or #94

#96 #23 AND #56 AND #95

**Database:** **CINAHL: Cumulative Index of Nursing and Allied Health Literature <1980 to 2021 January 25>**

((MH“dizziness”) OR (MH "Vertigo") OR vertigo OR dizz* OR "light-headed*" OR faintness OR (MH"Balance, Postural") OR MH("Proprioception") OR "postural balance" OR "postural instability" OR “postural control” OR Ataxia OR equilibrium OR disequilibrium OR imbalance OR unstead* OR proprioception OR “proprioceptive imbalance”) **AND**

((MH "Manipulation, Osteopathic") OR “classic osteopath*” OR "osteopathic intervention" OR "osteopathic manipulation" OR "osteopathic treatment" OR "osteopathic manual" OR "cranial osteopathy" OR "cranial osteopathic" OR "visceral osteopathy" OR "visceral osteopathic" OR (MH “Manipulation, Orthopedic”) OR (MH "Manipulation, Chiropractic") OR (MH "Massage") OR (MH "Myofascial Release") OR (MH "Manual Therapy") OR (MH "Craniosacral therapy") OR (MH “applied kinesiology”) OR (MH “joint mobilization”) OR (MH “acupressure”) OR "manual therapy" OR "manipulative therapy" OR "lumbar manipulation" OR "cervical manipulation" OR "spinal manipulation" OR "musculoskeletal manipulations" OR "craniosacral manipulation" OR "craniosacral technique" OR "visceral manipulation" OR massage[title] OR "joint manipulation" OR "joint mobilization" OR "manipulative physiotherapy" OR acupressure OR shiatsu OR **“**soft tissue manipul*” OR “soft tissue therap*” OR “myofascial release”) **AND**

((MH "Benign Paroxysmal Positional Vertigo") OR (MH "Ear, Inner") OR (MH "Vestibule, Labyrinth") OR (MH "Labyrinth Diseases") OR (MH "Meniere's Disease") OR (MH “Endolymphatic hydrops”) OR (MH "Labyrinthitis") OR (MH "Vestibular Diseases") OR (MH "Benign Paroxysmal Positional Vertigo") OR “Labyrinth disease” OR “Vestibular apparatus” OR “Ear disorders” OR “vestibular disease” OR “inner ear” OR "Cochlear Diseases" OR "Endolymphatic Hydrops" OR "Meniere Disease" OR "Labyrinthitis" OR "Bilateral Vestibulopathy" OR "Benign Paroxysmal Positional Vertigo" OR “vestibular peripheral vertigo” OR “vestibular vertigo” OR “cervical vertigo” OR “Cervicogenic vertigo” OR ‘cervicogenic dizziness” OR “Vestibular neuronitis” OR “vestibular balance disorder” OR neurootol* O**R** (MH "Multiple Sclerosis+") OR (MH "Parkinson Disease") OR (MH "Parkinsonian Disorders+") OR (MH "Head Injuries+") OR (MH "Brain Concussion+") OR (MH” Movement disorders”) OR “multiple sclerosis” OR "Closed head injury" OR Concussion OR "Traumatic Brain Injury" OR TBI)

**Database: Embase <1974 to 2021 January 25>**

1. exp Vertigo/)
2. vertigo.mp.
3. vertig*.mp.
4. exp dizziness/di, dm, ep, et, rh, th [Diagnosis, Disease Management, Epidemiology, Etiology, Rehabilitation, Therapy]
5. exp positional dizziness/co, dm, ep, et, rh, th [Complication, Disease Management, Epidemiology, Etiology, Rehabilitation, Therapy]
6. Dizziness.mp.
7. dizz*.mp.
8. light-headedness.mp.
9. faintness.mp.
10. exp Postural Balance/
11. postural balance.mp.
12. exp Gait Disorders/
13. postural instability.mp.
14. postural control.mp.
15. disequilibrium.mp.
16. dysequilibrium.mp.
17. proprioception.mp. or exp Proprioception/
18. propriocept*.mp.
19. falls.mp.
20. exp ataxia/di, dm, ep, et, rh, si, th [Diagnosis, Disease Management, Epidemiology, Etiology, Rehabilitation, Side Effect, Therapy]
21. Ataxia.mp.
22. Equilibrium.mp. or exp body equilibrium/
23. or/1-22
24. exp Osteopathic Medicine/ or exp Manipulation, Osteopathic/
25. osteopathic intervention.mp.
26. osteopathic man*.mp.
27. osteopathic treatment.mp.
28. cranial osteopath*.mp.
29. visceral osteopath*.mp.
30. chiropractic treat*.mp.
31. High velocity low amplitude.mp.
32. HVLA.mp.
33. myofascial release.mp.
34. Soft tissue therap*.mp.
35. Soft tissue manipulation.mp.
36. shiatsu.mp.
37. acupressure.mp. or Acupressure/
38. manipulative physiotherapy.mp.
39. joint mobilization.mp.
40. exp "Range of Motion, Articular"/ or joint manipulation.mp.
41. chiropractic man*.mp.
42. manual therapy.mp. or exp Musculoskeletal Manipulations/
43. manipulative therapy.mp.
44. exp Manipulation, Spinal/
45. cervical manipulation.mp.
46. lumbar manipulation.mp.
47. craniosacral manipulation.mp.
48. craniosacral technique.mp.
49. visceral manipulation.mp.
50. massage.mp.
51. or/23-50
52. cerebellar ataxia.mp.
53. cerebellar dysfunction.mp.
54. Movement Disorders.mp.
55. exp Movement Disorders/
56. Traumatic Brain Injury.mp.
57. TBI.mp.
58. Post concussive syndrome.mp.
59. Concussion.mp.
60. exp Post-Concussion Syndrome/ or exp Brain Injuries/
61. Closed head injury.mp.
62. exp Head Injuries, Closed/
63. exp Parkinsonian Disorders/
64. Parkinsonism.mp.
65. Parkinson disease.mp. or exp Parkinson Disease/
66. Multiple Sclerosis.mp.
67. vestibulopathy.mp.
68. Neurotology.mp.
69. exp Neurotology/
70. neuro-otology*.mp.
71. cervicogenic dizziness.mp.
72. exp Post-Concussion Syndrome/ or Cervicogenic vertigo.mp.
73. cervical vertigo.mp.
74. vestibular vertigo.mp.
75. BPV.mp.
76. BPPV.mp.
77. vestibular peripheral vertigo.mp.
78. exp Vestibular Neuronitis/
79. exp Benign Paroxysmal Positional Vertigo/
80. exp Labyrinth Diseases/
81. Labyrinthine disease.mp.
82. Labyrinth disease.mp.
83. exp Vestibular Diseases/
84. vestibular disease.mp.
85. exp Ear, Inner/
86. exp Tinnitus/
87. exp Endolymphatic Hydrops/
88. Endolymphatic Hydrops.mp.
89. Meniere Disease.mp.
90. exp Labyrinthitis/
91. exp vestibular system/
92. Vestibular apparatus.mp.
93. Ear disorders.mp.
94. or/52-93
95. 23 AND 51 AND 94

**Database: Emcare**

1. exp Vertigo/
2. vertigo.mp.
3. vertig*.mp.
4. exp Dizziness/ [Diagnosis, Drug Therapy, Epidemiology, Etiology, Pathology, Physiopathology, Prevention & Control, Rehabilitation, Therapy]
5. dizz*.mp.
6. light-headedness.mp.
7. faintness.mp.
8. exp Postural Balance/ [Physiopathology]
9. postural balance.mp.
10. exp Gait Disorders, Neurologic/ [Epidemiology, Etiology, Pathology, Rehabilitation, Therapy]
11. postural instability.mp.
12. postural control.mp.
13. disequilibrium.mp.
14. dysequilibrium.mp.
15. proprioception.mp. or exp Proprioception/
16. propriocept*.mp.
17. falls.mp.
18. exp Ataxia/ or exp Gait Ataxia/
19. ataxia.mp.
20. Equilibrium.mp.
21. **or/1-20**
22. exp Osteopathic Medicine/ or exp Manipulation, Osteopathic/
23. osteopathic intervention.mp.
24. osteopathic man*.mp.
25. osteopathic treatment.mp.
26. cranial osteopath*.mp.
27. visceral osteopath*.mp.
28. chiropractic treat*.mp.
29. chiropractic man*.mp.
30. manual therapy.mp. or exp Musculoskeletal Manipulations/
31. manipulative therapy.mp.
32. exp Manipulation, Spinal/ [Adverse Effects, Classification, Methods, Statistics & Numerical Data, Trends]
33. High velocity low amplitude.mp.
34. HVLA.mp.
35. myofascial release.mp.
36. cervical manipulation.mp.
37. lumbar manipulation.mp.
38. craniosacral manipulation.mp.
39. Soft tissue therap*.mp.
40. Soft tissue manipulation.mp.
41. shiatsu.mp.
42. acupressure.mp. or Acupressure/
43. manipulative physiotherapy.mp.
44. joint mobilization.mp.
45. exp "Range of Motion, Articular"/ or joint manipulation.mp.
46. massage.mp.
47. visceral manipulation.mp.
48. craniosacral technique.mp.
49. **or/22-48**
50. Ear disorders.mp.
51. Vestibular apparatus.mp.
52. exp Vestibule, Labyrinth/ [Diagnosis, Injuries, Innervation, Pathology, Physiopathology]
53. cerebellar ataxia.mp.
54. cerebellar dysfunction.mp.
55. Movement Disorders.mp.
56. exp Movement Disorders/ [Classification, Complications, Diagnosis, Epidemiology, Etiology, Pathology, Physiology, Physiopathology, Rehabilitation, Therapy]
57. Traumatic Brain Injury.mp.
58. TBI.mp.
59. Post concussive syndrome.mp.
60. Concussion.mp.
61. exp Post-Concussion Syndrome/ or exp Brain Injuries/
62. Closed head injury.mp.
63. exp Head Injuries, Closed/ [Classification, Complications, Diagnosis, Diagnostic Imaging, Epidemiology, Etiology, Pathology, Physiopathology, Prevention & Control, Therapy] (76974)
64. exp Parkinsonian Disorders/ [Classification, Complications, Diagnosis, Epidemiology, Etiology, Pathology, Physiopathology, Prevention & Control, Rehabilitation, Therapy]
65. Parkinsonism.mp.
66. Parkinson disease.mp. or exp Parkinson Disease/
67. Multiple Sclerosis.mp.
68. vestibulopathy.mp.
69. Neurotology.mp.
70. exp Neurotology/ [Methods, Statistics & Numerical Data, Trends]
71. neuro-otology*.mp.
72. cervicogenic dizziness.mp.
73. exp Post-Concussion Syndrome/ or Cervicogenic vertigo.mp.
74. cervical vertigo.mp.
75. vestibular vertigo.mp.
76. BPV.mp.
77. BPPV.mp.
78. vestibular peripheral vertigo.mp.
79. exp Vestibular Neuronitis/ [Classification, Complications, Diagnosis, Epidemiology, Etiology, Pathology, Physiopathology, Rehabilitation, Therapy]
80. exp Benign Paroxysmal Positional Vertigo/ [Classification, Complications, Diagnosis, Epidemiology, Etiology, Physiopathology, Prevention & Control, Rehabilitation, Therapy]
81. exp Labyrinthitis/ [Classification, Complications, Diagnosis, Epidemiology, Etiology, Pathology, Physiopathology, Prevention & Control, Rehabilitation, Therapy]
82. exp Endolymphatic Hydrops/ [Classification, Diagnosis, Epidemiology, Etiology, Pathology, Prevention & Control, Rehabilitation, Therapy]
83. exp Ear, Inner/ [Diagnosis, Immunology, Innervation, Microbiology, Pathology, Physiopathology, Virology]
84. exp Vestibular Diseases/ [Classification, Epidemiology, Etiology, Pathology, Prevention & Control, Rehabilitation, Therapy]
85. exp Labyrinth Diseases/ [Classification, Epidemiology, Etiology, Pathology, Physiopathology, Rehabilitation, Therapy]
86. Meniere Disease.mp.
87. Endolymphatic Hydrops.mp.
88. exp Tinnitus/
89. vestibular disease.mp.
90. Labyrinth disease.mp.
91. Labyrinthine disease.mp.
92. Ear disorders.mp.
93. **or/50-92**
94. **21 and 49 and 93**

**MEDLINE(R) and Epub Ahead of Print, In-Process & Other Non-Indexed Citations, Daily and Versions(R) <1946 to January 25, 2021>**

1. exp Vertigo/
2. vertigo.mp.
3. vertig*.mp.
4. exp Dizziness/di, dt, ep, et, pa, pp, pc, rh, th [Diagnosis, Drug Therapy, Epidemiology, Etiology, Pathology, Physiopathology, Prevention & Control, Rehabilitation, Therapy]
5. dizz*.mp.
6. light-headedness.mp.
7. faintness.mp.
8. exp Postural Balance/pp [Physiopathology]
9. postural balance.mp.
10. exp Gait Disorders, Neurologic/ep, et, pa, rh, th [Epidemiology, Etiology, Pathology, Rehabilitation, Therapy]
11. postural instability.mp.
12. postural control.mp.
13. disequilibrium.mp.
14. dysequilibrium.mp.
15. proprioception.mp. or exp Proprioception/
16. propriocept*.mp.
17. falls.mp.
18. exp Ataxia/ or exp Gait Ataxia/
19. ataxia.mp.
20. Equilibrium.mp.
21. OR/1-20
22. exp Osteopathic Medicine/ or exp Manipulation, Osteopathic/
23. osteopathic intervention.mp.
24. osteopathic man*.mp.
25. osteopathic treatment.mp.
26. cranial osteopath*.mp.
27. visceral osteopath*.mp.
28. chiropractic treat*.mp.
29. chiropractic man*.mp.
30. manual therapy.mp. or exp Musculoskeletal Manipulations/
31. manipulative therapy.mp.
32. exp Manipulation, Spinal/ae, cl, mt, sn, td [Adverse Effects, Classification, Methods, Statistics & Numerical Data, Trends]
33. cervical manipulation.mp.
34. lumbar manipulation.mp.
35. craniosacral manipulation.mp.
36. craniosacral technique.mp.
37. visceral manipulation.mp.
38. massage.mp.
39. exp "Range of Motion, Articular"/ or joint manipulation.mp.
40. joint mobilization.mp.
41. manipulative physiotherapy.mp.
42. acupressure.mp. or Acupressure/
43. shiatsu.mp.
44. Soft tissue manipulation.mp.
45. Soft tissue therap*.mp.
46. myofascial release.mp.
47. HVLA.mp.
48. High velocity low amplitude.mp.
49. **or/22-48**
50. exp Labyrinth Diseases/cl, ep, et, pa, pp, rh, th [Classification, Epidemiology, Etiology, Pathology, Physiopathology, Rehabilitation, Therapy]
51. Labyrinthine disease.mp.
52. Labyrinth disease.mp.
53. exp Vestibular Diseases/cl, ep, et, pa, pc, rh, th [Classification, Epidemiology, Etiology, Pathology, Prevention & Control, Rehabilitation, Therapy]
54. vestibular disease.mp.
55. exp Ear, Inner/di, im, ir, mi, pa, pp, vi [Diagnosis, Immunology, Innervation, Microbiology, Pathology, Physiopathology, Virology]
56. exp Tinnitus/
57. exp Endolymphatic Hydrops/cl, di, ep, et, pa, pc, rh, th [Classification, Diagnosis, Epidemiology, Etiology, Pathology, Prevention & Control, Rehabilitation, Therapy]
58. Endolymphatic Hydrops.mp.
59. Meniere Disease.mp.
60. exp Labyrinthitis/cl, co, di, ep, et, pa, pp, pc, rh, th [Classification, Complications, Diagnosis, Epidemiology, Etiology, Pathology, Physiopathology, Prevention & Control, Rehabilitation, Therapy]
61. exp Benign Paroxysmal Positional Vertigo/cl, co, di, ep, et, pp, pc, rh, th [Classification, Complications, Diagnosis, Epidemiology, Etiology, Physiopathology, Prevention & Control, Rehabilitation, Therapy]
62. exp Vestibular Neuronitis/cl, co, di, ep, et, pa, pp, rh, th [Classification, Complications, Diagnosis, Epidemiology, Etiology, Pathology, Physiopathology, Rehabilitation, Therapy]
63. vestibular peripheral vertigo.mp.
64. BPPV.mp.
65. BPV.mp.
66. vestibular vertigo.mp.
67. cervical vertigo.mp.
68. exp Post-Concussion Syndrome/ or Cervicogenic vertigo.mp.
69. cervicogenic dizziness.mp.
70. neuro-otology*.mp.
71. exp Neurotology/mt, sn, td [Methods, Statistics & Numerical Data, Trends]
72. Neurotology.mp.
73. vestibulopathy.mp.
74. Multiple Sclerosis.mp.
75. Parkinson disease.mp. or exp Parkinson Disease/
76. Parkinsonism.mp.
77. exp Parkinsonian Disorders/cl, co, di, ep, et, pa, pp, pc, rh, th [Classification, Complications, Diagnosis, Epidemiology, Etiology, Pathology, Physiopathology, Prevention & Control, Rehabilitation, Therapy]
78. exp Head Injuries, Closed/cl, co, di, dg, ep, et, pa, pp, pc, th [Classification, Complications, Diagnosis, Diagnostic Imaging, Epidemiology, Etiology, Pathology, Physiopathology, Prevention & Control, Therapy]
79. Closed head injury.mp.
80. exp Post-Concussion Syndrome/ or exp Brain Injuries/
81. Concussion.mp.
82. Post concussive syndrome.mp.
83. TBI.mp.
84. Traumatic Brain Injury.mp.
85. exp Movement Disorders/cl, co, di, ep, et, pa, ph, pp, rh, th [Classification, Complications, Diagnosis, Epidemiology, Etiology, Pathology, Physiology, Physiopathology, Rehabilitation, Therapy]
86. Movement Disorders.mp.
87. cerebellar dysfunction.mp.
88. cerebellar ataxia.mp.
89. exp Vestibule, Labyrinth/di, in, ir, pa, pp [Diagnosis, Injuries, Innervation, Pathology, Physiopathology]
90. Vestibular apparatus.mp.
91. Ear disorders.mp.
92. OR/ 50-92
93. 21 AND 49 AND 92

**Database: OSTMED.DR <Inception to January Week 3 2021>**

("Dizziness"[Mesh] OR "Vertigo"[Mesh] OR vertigo OR dizz* OR "light-headed*" OR faintness OR "Postural Balance"[Mesh] OR "Proprioception"[Mesh] OR "postural balance" OR "postural instability" OR “postural control” OR equilibrium OR disequilibrium OR imbalance OR unstead* OR proprioception OR  "Accidental Falls"[Mesh] OR “accidental falls” OR “falls”[title]) **AND** ("Manipulation, Osteopathic"[Mesh] OR "Manipulation, Orthopedic"[Mesh] OR "Osteopathic Medicine"[Mesh] OR "osteopathic intervention" OR "osteopathic man*" OR "osteopathic treatment" OR "cranial osteopath*" OR "visceral osteopath*" OR   "Musculoskeletal Manipulations"[Mesh] OR "Manipulation, Chiropractic"[Mesh] OR "Manipulation, Spinal"[Mesh] OR "Therapy, Soft Tissue"[Mesh] OR "Massage"[Mesh] OR “acupressure”[Mesh] OR "manual therapy" OR "manipulative therapy" OR "lumbar manipulation" OR "cervical manipulation" OR "spinal manipulation" OR “chiropractic treat*” OR “chiropractic man*” OR “chiropractic intervention” OR "musculoskeletal manipulations" OR "craniosacral manipulation" OR "craniosacral technique" OR "visceral manipulation" OR massage[title] OR "joint manipulation" OR "joint mobilization" OR "manipulative physiotherapy" OR acupressure OR shiatsu OR “Soft tissue manipul*” OR “Soft tissue therap*” OR “myofascial release” OR “Fascial manipul*” OR “Spinal mobilization” OR HVLA OR “high-velocity low-amplitude”)  **AND** ("Ear, Inner"[Mesh] OR "Labyrinth Diseases"[Mesh] OR "Vestibular Diseases"[Mesh] OR "Endolymphatic Hydrops"[Mesh] OR "Bilateral Vestibulopathy"[Mesh] OR “Labyrinth disease” OR “vestibular disease*” OR “inner ear” OR "Cochlear Disease*" OR "Endolymphatic Hydrops" OR "Meniere Disease" OR "Labyrinthitis" OR "Benign Paroxysmal Positional Vertigo" OR “vestibular peripheral vertigo” OR “vestibular vertigo” OR “cervical vertigo” OR  “Cervicogenic vertigo” OR “cervicogenic dizziness” OR “Vestibular neuronitis”  OR neurooto* OR vestibulopathy OR "Multiple Sclerosis" OR "Multiple Sclerosis"[Mesh] OR "Parkinson Disease"[Mesh] OR "Parkinsonian Disorders"[Mesh] OR "Parkinson’s disease" OR Parkinsonism OR "Head Injuries, Closed"[Mesh] OR "Brain Concussion"[Mesh] OR "Brain Injuries, Traumatic"[Mesh] OR "Closed head injury" OR Concussion OR "Traumatic Brain Injury" OR TBI OR "Movement Disorders"[Mesh] OR "Semicircular Canal Dehiscence")

**Database: APA PsycInfo <1806 to January Week 3 2021>**

1. exp Vertigo/
2. falls.mp.
3. vertigo.mp.
4. vertig*.mp.
5. exp Dizziness/
6. dizz*.mp.
7. light-headedness.mp.
8. faintness.mp.
9. postural balance.mp.
10. exp Gait/ or exp Posture/ or exp Falls/
11. Gait Disorders.mp.
12. postural instability.mp.
13. postural control.mp.
14. disequilibrium.mp.
15. dysequilibrium.mp.
16. proprioception.mp. or exp Proprioception/
17. propriocept*.mp.
18. exp Ataxia/
19. ataxia.mp.
20. equilibrium.mp. or exp Equilibrium/
21. or/1-21
22. High velocity low amplitude.mp.
23. HVLA.mp.
24. myofascial release.mp.
25. Soft tissue therap*.mp.
26. Soft tissue manipulation.mp.
27. shiatsu.mp.
28. acupressure.mp. or Acupressure/
29. manipulative physiotherapy.mp.
30. joint mobilization.mp.
31. exp Range of Motion, Articular/ or joint manipulation.mp.
32. massage.mp.
33. visceral manipulation.mp.
34. craniosacral technique.mp.
35. craniosacral manipulation.mp.
36. lumbar manipulation.mp.
37. cervical manipulation.mp.
38. Manipulation, Spinal.mp.
39. manipulative therapy.mp.
40. manual therapy.mp. or exp Musculoskeletal Manipulations/
41. chiropractic man*.mp.
42. chiropractic treat*.mp.
43. visceral osteopath*.mp.
44. cranial osteopath*.mp.
45. osteopathic treatment.mp.
46. osteopathic man*.mp.
47. osteopathic intervention.mp.
48. exp Osteopathic Medicine/ or exp Manipulation, Osteopathic/
49. or/22-48
50. cerebellar ataxia.mp.
51. cerebellar dysfunction.mp.
52. Movement Disorders.mp.
53. exp Movement Disorders/
54. Traumatic Brain Injury.mp.
55. TBI.mp.
56. Post concussive syndrome.mp.
57. Concussion.mp.
58. exp Post-Concussion Syndrome/ or exp Brain Injuries/
59. exp Brain Concussion/ or exp Traumatic Brain Injury/ or Post Concussion Syndrome.mp. or exp Head Injuries/
60. Closed head injury.mp.
61. Head Injuries, Closed.mp.
62. Parkinsonian Disorders/
63. Parkinson disease.mp. or exp Parkinson Disease/
64. exp Parkinson's Disease/ or Parkinson disease.mp.
65. Multiple Sclerosis.mp.
66. vestibulopathy.mp.
67. Neurotology.mp.
68. exp Tinnitus/ or exp Hearing Disorders/
69. neuro-otology*.mp.
70. cervicogenic dizziness.mp.
71. Cervicogenic vertigo.mp.
72. cervical vertigo.mp.
73. vestibular vertigo.mp.
74. BPV.mp.
75. BPPV.mp.
76. vestibular peripheral vertigo.mp.
77. Vestibular Neuronitis.mp.
78. exp Ear Disorders/ or Benign Paroxysmal Positional Vertigo.mp.
79. Meniere Disease.mp.
80. Endolymphatic Hydrops.mp.
81. exp Vestibular Apparatus/ or exp Menieres Disease/
82. Ear, Inner.mp.
83. vestibular disease.mp.
84. exp Vestibular Apparatus/ or exp Labyrinth Disorders/
85. Vestibular Diseases.mp.
86. Labyrinth disease.mp.
87. Labyrinthine disease.mp.
88. or/ 50-88
89. 21 AND 49 AND 88

**Database: PUBMED: <1804 to January Week 3 2021>**

(("Dizziness"[Mesh] OR "Vertigo"[Mesh] OR vertigo OR dizz* OR "light-headed*" OR faintness) OR (“Postural Balance"[Mesh] OR "Proprioception"[Mesh] OR "postural balance" OR "postural instability" OR “postural control” OR equilibrium OR disequilibrium OR imbalance OR unstead* OR proprioception)) **AND**

(("Manipulation, Osteopathic"[Mesh] OR "Manipulation, Orthopedic"[Mesh] OR "Osteopathic Medicine"[Mesh] OR "osteopathic intervention" OR "osteopathic man*" OR "osteopathic treatment" OR "cranial osteopath*" OR "visceral osteopath*") OR ("Musculoskeletal Manipulations"[Mesh] OR "Manipulation, Chiropractic"[Mesh] OR "Manipulation, Spinal"[Mesh] OR "Chiropractic"[Mesh] OR "Therapy, Soft Tissue"[Mesh] OR "Massage"[Mesh] OR “acupressure”[Mesh] OR "manual therapy" OR "manipulative therapy" OR "lumbar manipulation" OR "cervical manipulation" OR "spinal manipulation" OR "musculoskeletal manipulations" OR "craniosacral manipulation" OR "craniosacral technique" OR "visceral manipulation" OR massage[title] OR "joint manipulation" OR "joint mobilization" OR "manipulative physiotherapy" OR acupressure OR shiatsu OR “Soft tissue manipul*” OR “Soft tissue therap*” OR “myofascial release”)) **AND**

("Ear, Inner"[Mesh] OR "Labyrinth Diseases"[Mesh] OR "Vestibular Diseases"[Mesh] OR “Labyrinth disease” OR “vestibular disease” OR “inner ear” OR "Cochlear Diseases" OR "Endolymphatic Hydrops" OR "Meniere Disease" OR "Labyrinthitis" OR "Bilateral Vestibulopathy" OR "Benign Paroxysmal Positional Vertigo" OR “vestibular peripheral vertigo” OR “vestibular vertigo” OR “cervical vertigo” OR “Cervicogenic vertigo” OR ‘cervicogenic dizziness” OR “Vestibular neuronitis” OR neurootol* OR vestibulopathy OR "Multiple Sclerosis" OR "Multiple Sclerosis"[Mesh] OR "Parkinson Disease"[Mesh] OR "Parkinsonian Disorders"[Mesh] OR "Parkinson’s disease" OR Parkinsonism OR "Head Injuries, Closed"[Mesh] OR "Brain Concussion"[Mesh] OR "Brain Injuries, Traumatic"[Mesh] OR "Closed head injury" OR Concussion OR "Traumatic Brain Injury" OR TBI "Multiple Sclerosis"[Mesh] OR "Parkinson Disease"[Mesh] OR "Parkinsonian Disorders"[Mesh] OR “Parkinson’s disease” OR "Head Injuries, Closed"[Mesh] OR "Brain Concussion"[Mesh] OR "Brain Injuries, Traumatic"[Mesh] OR "Closed head injury" OR Concussion OR "Traumatic Brain Injury" OR TBI OR "Movement Disorders"[Mesh]))

**Supplementary Table 2.** Categorization of Osteopathic Manipulative Treatment (OMT) and Analogous Technique (OMTa) Interventions and Comparator Interventions Used in the Reviewed Studies

| **Author (Publication Year)** | **Interventions in Study Groups** | **Intervention Description** | **Categorization for Current Reviewa** |
| --- | --- | --- | --- |
| Atay et al (2021) | OMT | Multiple technique approach: OCMM with MET, MFR; per clinician evaluation | Cranial OMT + |
| Dimenhydrinate | Dimenhydrinate | Dimenhydrinate |
| Carrasco-Uribarren et al (2021) | Physiotherapy (OMTa) | HVLA-focused: ST then cervical traction HVLA to upper cervical spine; per protocol | HVLA |
| Rest/supine | Resting supine; per protocol | Control |
| DiFrancisco-Donoghue et al (2017) | OMT | Multiple technique approach: OCMM, ART, MET, MFR, ST; per protocol | OMT + |
| Counseling | Counseling: disease history, causes/precautions of falls, nutrition, mental health, exercise/movement, wellness, relaxation, overall health; per protocol | Counseling |
| do Nascimento Oliveira et al (2020) | OMT | OCMM; per protocol | Cranial OMT |
| Control | Light-touch simulation of techniques used in OMT intervention group; per protocol | Control |
| Fraix et al (2021) | OMT | Multiple technique approach: HVLA with CS, MFR, BLT, ST; per clinician evaluation | HVLA, OMT + |
| OMT and VRT | Multiple technique approach: HVLA with CS, MFR, BLT, ST and VRT protocol; per clinician evaluation | HVLA, OMT +, VRT |
| VRT alone | Participants with peripheral vestibular hypofunction or motion hypersensitivity received condition-specific exercises for balance and proprioception retraining per VRT protocol | VRT |
| No intervention | Participants came in for outcome measurements with no intervention | Control |
| Heikkilä et al (2000) | Cervical manipulation (OMTa) | HVLA-focused: cervical and thoracic HVLA; per clinician evaluation | HVLA |
| Acupuncture | Acupuncture therapy based on analysis of different functions, such as mobility, muscle tension, tone, and participant complaints; per clinician evaluation | Acupuncture |
| Ketoprofen gel | NSAID gel (ketoprofen) applied by participant; per protocol | Ketoprofen gel |
| Control | No interventions permitted | Control |
| Karlberg et al (1996) | Chiropractic (OMTa) | ART-focused: mobilization (ART) with ST, MET.  Treatment could include some or all of the following: manual treatments, exercise prescription, relaxation techniques, and minor ergonomic changes. No balance or vestibular rehabilitation included; per clinician evaluation | Articular |
| Control | No intervention | Control |
| Kendall et al (2018) | Chiropractic (OMTa) | ART-focused: mobilization (ART) with ST, range of motion exercises, and Activator II; plus advice to apply heat at home; per protocol | Articular |
| Sham (Activator II instrument) and light touch | Activator II instrument impulses (set at zero) and gentle placement of the practitioner’s hands on the cervical and thoracic spine regions; per protocol | Control |
| Papa et al (2017) | OMT | Multiple technique approach: ART, MET, MFR, BLT, OCMM, HVLA; per protocol | OMT + |
| Sham (light touch) | Light-touch palpation on dysfunctional regions found during previous objective evaluation; per protocol | Control |
| Reid et al (2008) | Physical therapy (OMTa) | ART-focused: SNAGs (ART/MFR technique) at C1 or C2 and additional area if needed; plus, home exercise: self-performed SNAGs after second treatment; per clinician evaluation | Articular |
| Laser | Deactivated laser | Control |
| Reid et al (2015) | Physical therapy SNAGs (OMTa) | ART-focused: SNAGs (ART/MFR technique); plus, home exercise and self-mobilization using SNAG continued once daily until 12-mo follow-up; per clinician evaluation | Articular |
| Physical therapy Maitland technique (OMTa) | ART-focused: Maitland technique (ART/MFR technique) at C1 or C2 and additional area if needed; plus, home ROM exercise after second treatment; per clinician evaluation | Articular |
| Laser | Deactivated laser applied to neck; per protocol | Control |
| Sun et al (2014) | Diaoshi Jifa (OMTa) | PINS-focused: Diaoshi Jifa (PINS) followed by medicinal regimen (IV Ginkgo and oral betahistine); per protocol | PINS |
| Control | Medicinal regimen (IV Ginkgo and oral betahistine); per protocol | Control |

aPlus symbol (+) indicates the OMT protocol included multiple types of techniques that did not focus on a single technique.

Abbreviations:ART, articular; BLT, balanced ligamentous tension; CS, counterstain; HVLA, high-velocity, low-amplitude; MET, muscle energy technique; MFR, myofascial release; min: minutes; OCMM, osteopathic cranial manipulative medicine; PINS, progressive inhibition of neuromuscular structures; ROM, range of motion; SNAG, sustained natural apophyseal glides; ST, define; VRT, vestibular rehabilitation therapy.

**Supplementary Table 3.** Summary of Outcome Variables for Unpoolable Data in the Reviewed Studies

| **Author (Publication Year)** | **Intervention**  **(No. Participants)a** | **Comparator**  **(No. Participants)** | **Effect Estimateb** | **Comments** |
| --- | --- | --- | --- | --- |
| Disability Associated with Dizziness | | | | |
| Atay et al (2021)c | Cranial OMT + (15) | Dimenhydrinate (15) | −8.8 (−17.4 to −0.06)d,e | Three of 6 studies showed OMT OMTa techniques were significantly associated with reductions in disability associated with dizziness. |
| Carrasco-Uribarren et al (2021) | HVLA (20) | Control (20) | −23.0 (−35.0 to −11.0)d,f |
| Fraix et al (2021) | HVLA OMT + (6) | Control (5) | −3.6 (−38.5 to 31.3)f |
| Fraix et al (2021) | HVLA OMT + VRT (6) | Control (5) | −18.6 (−47.3 to 10.1)f |
| Papa et al (2017) | OMT + (19) | Control (12) | −10.0 (−23.5 to 2.3)f |
| Sun et al (2014) | PINS (16) | Control (10) | −39.4 (−52.9 to −25.8)d,f |
| Dizziness Severity | | | | |
| Atay et al (2021)c | Cranial OMT + (15) | Dimenhydrinate (15) | −2.3 (−2.8 to −1.7)d,e | Two of 3 studies showed significant reductions in dizziness severity. |
| Carrasco-Uribarren et al (2021) | HVLA (20) | Control (20) | −2.0 (−3.2 to −0.90)d,g |
| Heikkilä et al (2000) | OMT (14) | Control (14) | Not reported; *P*=.30 |
| Changes in Dizziness Symptomsh | | | | |
| do Nascimento Oliveira et al (2020) | Cranial OMT (10) | Control (10) | 10/10 vs 2/10  (OMT vs control) | All participants in the OMT group had improved symptoms, but only 2 participants in the control group did. |
| SF-36 Physical Component Summary Score | | | | |
| Kendall et al (2018) | Articular (12) | Control (10) | 3.8 (−5.1 to 12.6) | Articular OMT was not significantly associated with improvement in this score. |
| SF-36 Mental Component Summary Score | | | | |
| Kendall et al (2018) | Articular (12) | Control (10) | 24.1 (16.5 to 31.7)d | Articular OMT was significantly associated with improvement in this score. |
| Risk of Falls | | | | |
| Atay et al (2021)c | Cranial OMT + (15) | Dimenhydrinate (15) | −12.7 (−17.2 to −8.3)d,e | One of 3 studies showed dizziness was significantly associated with reductions in the risk of falls. |
| DiFrancisco-Donoghue et al (2017) | OMT + (9) | Counseling (9) | −0.6 (−3.0 to 1.8) |
| Kendall et al (2018) | Articular (12) | Control (10) | −2.3 (−7.2 to 2.6) |
| All-Cause Dropout Rates | | | | |
| DiFrancisco-Donoghue et al (2017) | OMT + (9) | Counselling (9) | 0.8 (0.04 to 17.2)i | None of the OMT techniques was significantly associated with this outcome. |
| Fraix et al (2021) | HVLA OMT + (6) | Control (5) | 0.3 (0.02 to 4.9)i |
| Fraix et al (2021) | HVLA OMT + VRT (6) | Control (5) | 0.1 (0 to 2.9)i |
| Papa et al (2017) | OMT + (19) | Control (12) | 0.03 (0 to 0.3)i |
| Sun et al (2014) | PINS (16) | Control (10) | 0.2 (0.01 to 5.7)i |
| Dropouts due to Inefficacy | | | | |
| Papa et al (2017) | OMT + (19) | Control (12) | 53.2 (2.6 to 1084.4) | Seven participants in the control group dropped out due to inefficacy. |
| Adverse Events | | | | |
| DiFrancisco-Donoghue et al (2017) | OMT + (9) | Counseling (9) | 3.4 (0.1 to 93.8) | One participant in the OMT group dropped out because of an adverse event. |

aPlus symbol (+) indicates the OMT protocol included multiple types of techniques that did not focus on a single technique.

bData are reported as reported as mean difference and associated 95% confidence interval, except for all-cause dropout rates which are reported as odds ratio and associated 95% CI.

cObservational study.

dA significant association was reported in the study.

fThe sensitivity analysis showed a significant association, but heterogeneity was high, reducing confidence in the evidence.

gIncluded in the sensitivity analysis.

hReported as a binary outcome.

iIncluded in the sensitivity analysis, but heterogeneity was high, reducing confidence in the evidence.

Abbreviations: HVLA, high-velocity, low-amplitude; OMT, osteopathic manipulative treatment; OMTa, analogous osteopathic manipulative treatment technique; PINS, progressive inhibition of neuromuscular structures; SF-36, 36-Item Short Form Health Survey; VRT, vestibular rehabilitation therapy.
