# Supplementary material for: Impact of osteopathic manipulative techniques on the management of dizziness caused by neuro-otologic disorders: systematic review and meta-analysis
Source: publisher site journal article supplement (doi:10.1515/jom-2022-0119), 2022-10-11
Supplement: Supplementary file 1 [file j_jom-2022-0119_suppl_002.pdf]

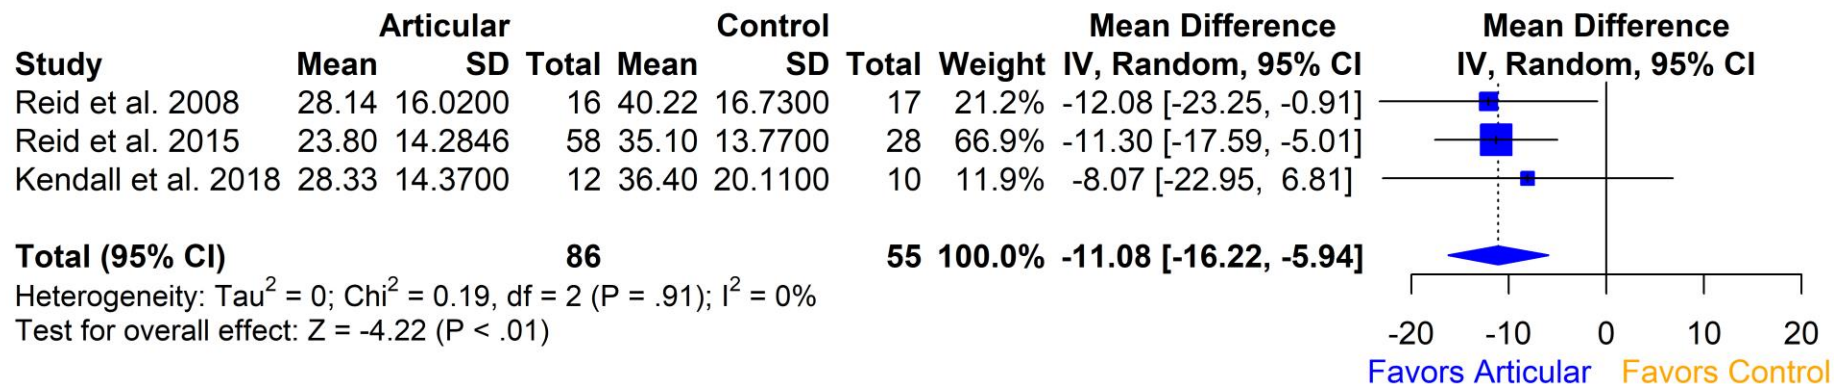

Supplementary Figure 1A.

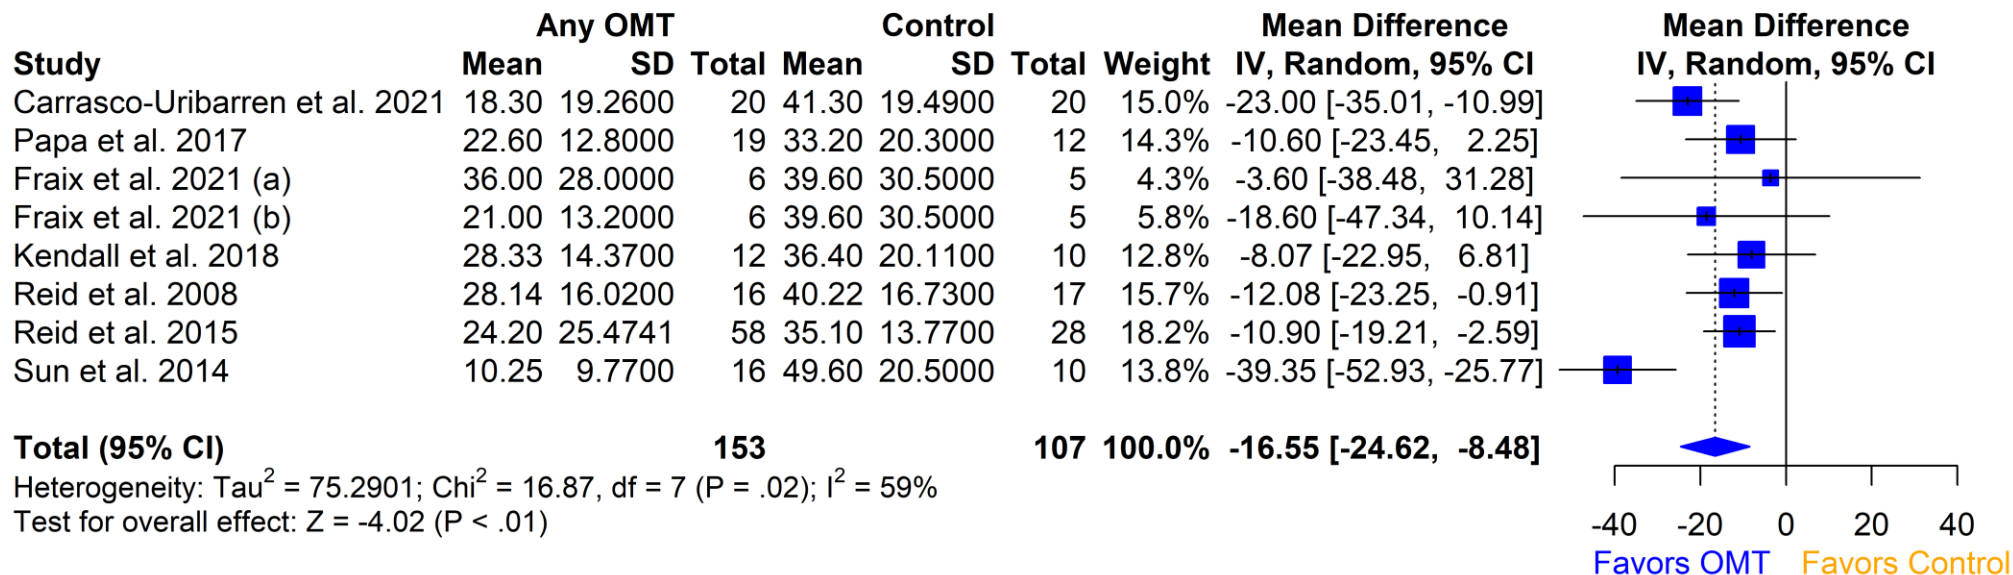

Supplementary Figure 1B.

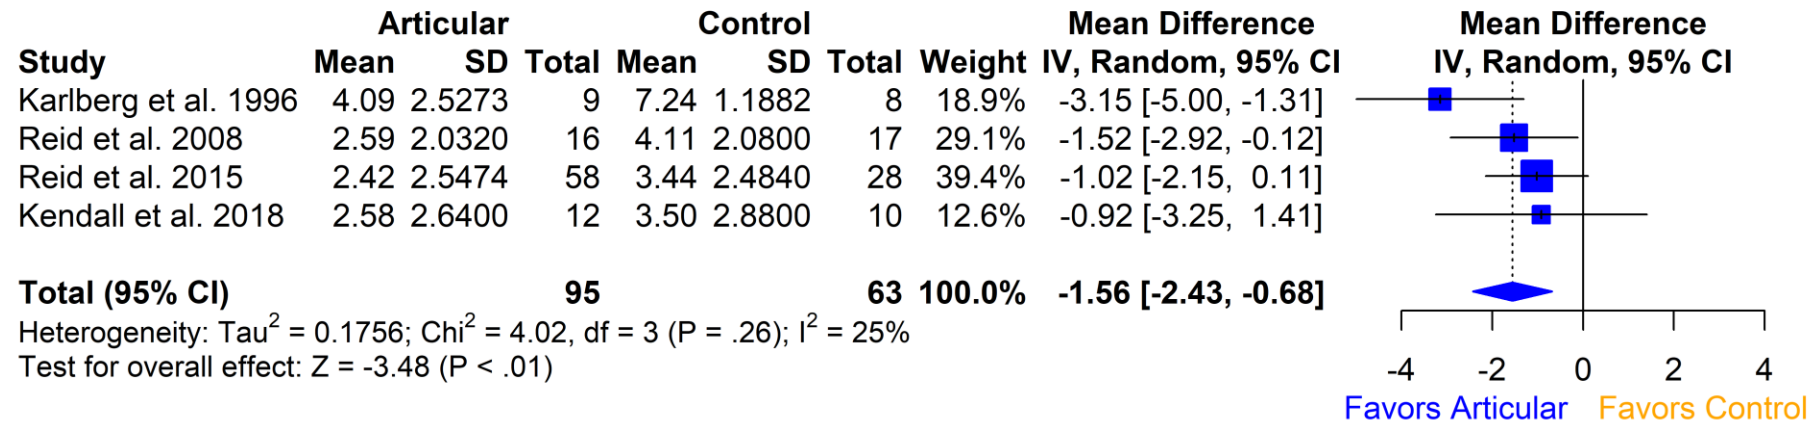

Supplementary Figure 2A.

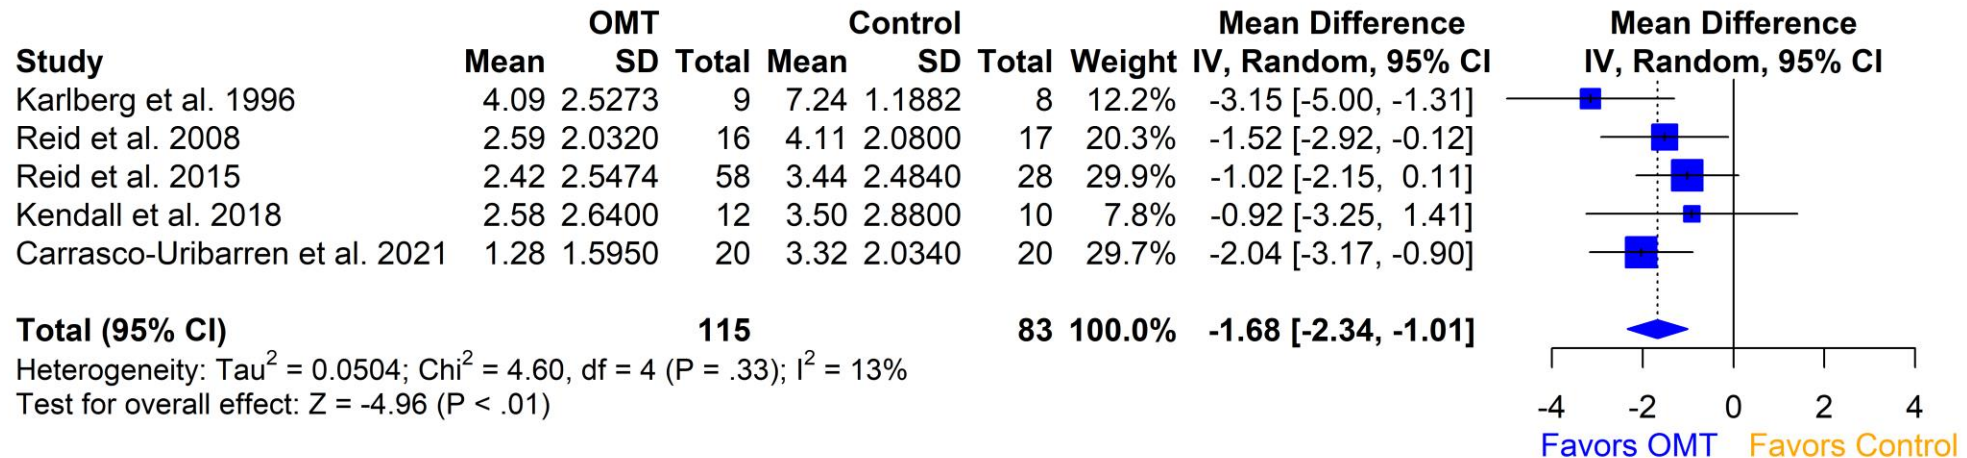

Supplementary Figure 2B.

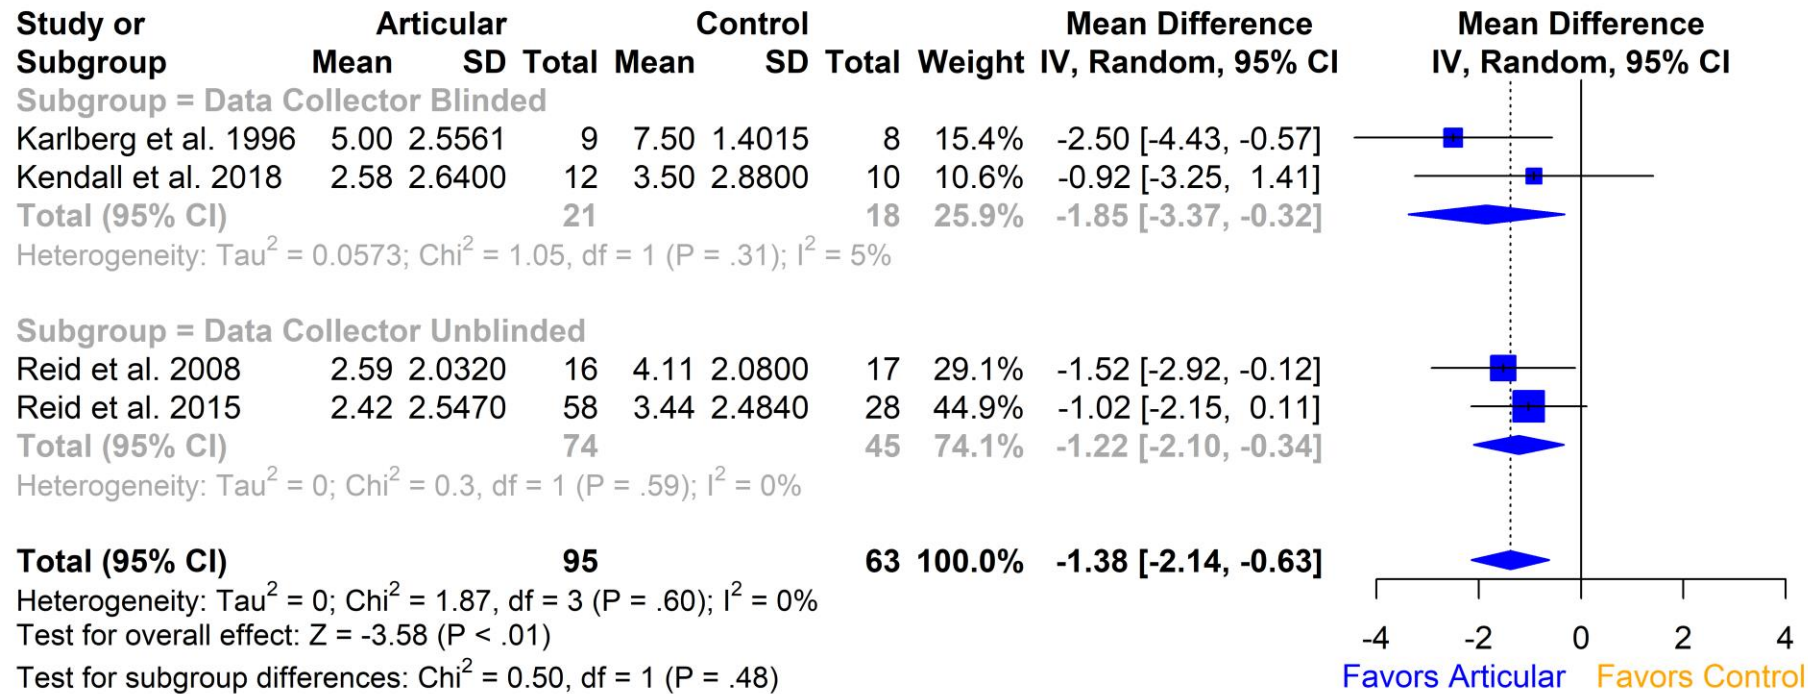

Supplementary Figure 3.

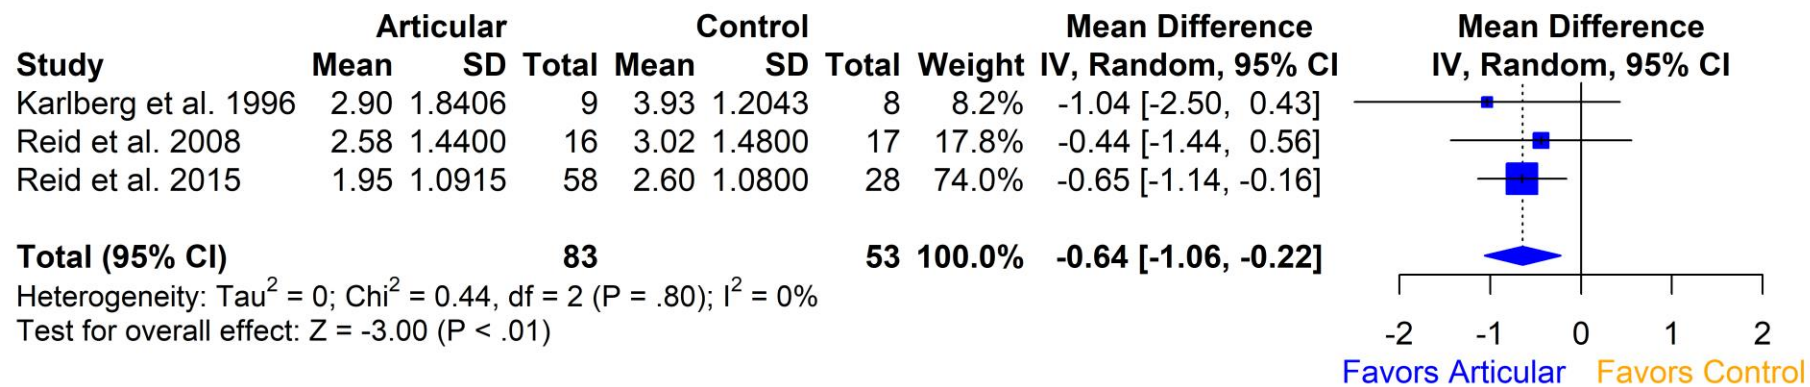

Supplementary Figure 4.

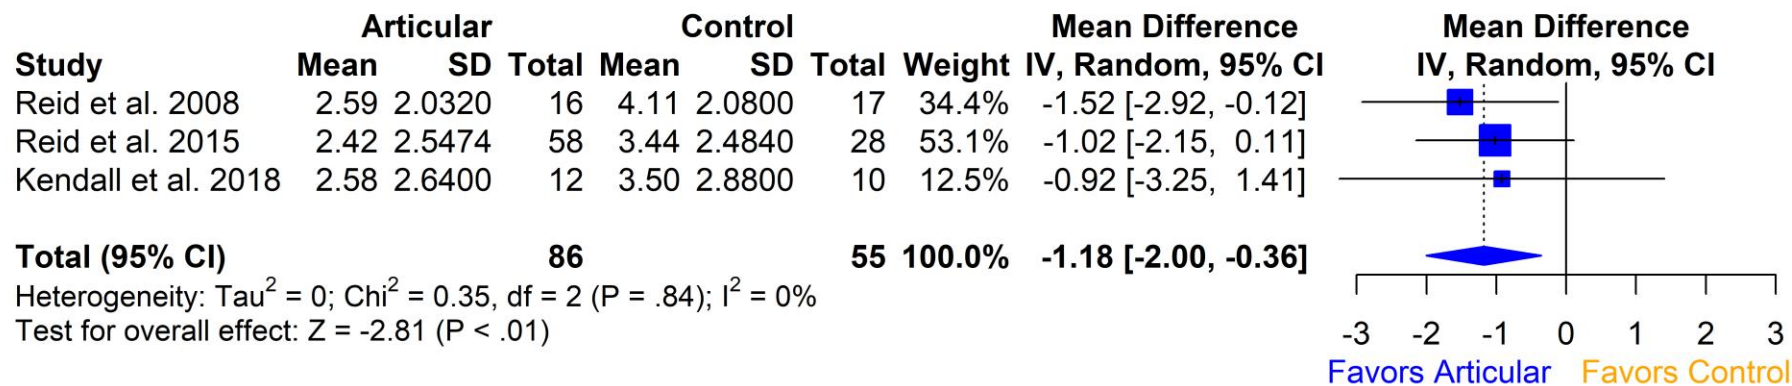

Supplementary Figure 5.

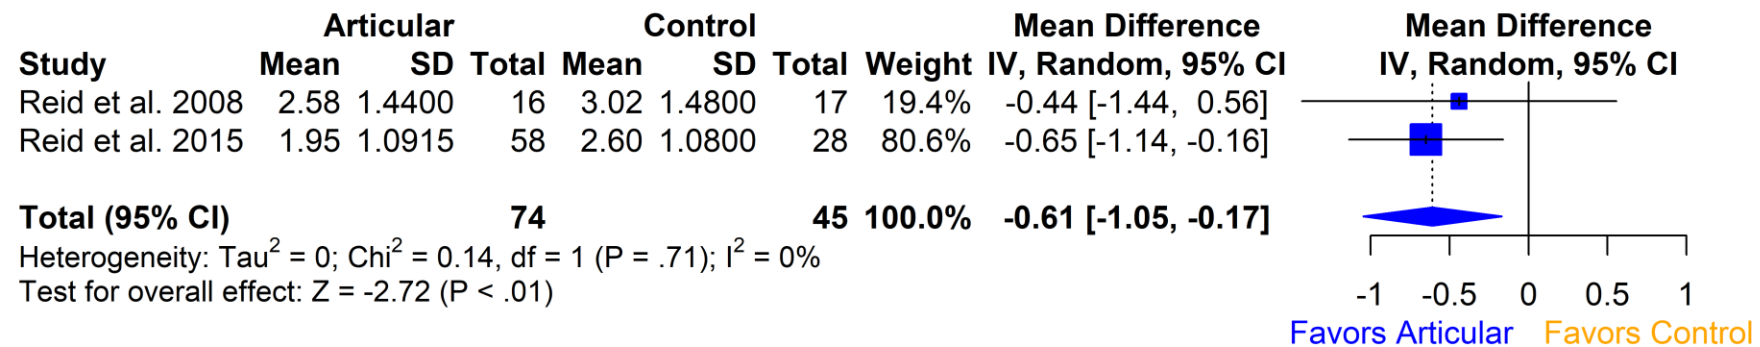

Supplementary Figure 6.



| Study                                                                                                  | Articular |           | Control |           | Weight        | Odds Ratio<br>MH, Random, 95% CI |
|--------------------------------------------------------------------------------------------------------|-----------|-----------|---------|-----------|---------------|----------------------------------|
|                                                                                                        | Events    | Total     | Events  | Total     |               |                                  |
| Reid et al. 2008                                                                                       | 1         | 17        | 0       | 17        | 22.0%         | 3.18 [0.12, 83.76]               |
| Reid et al. 2015                                                                                       | 6         | 56        | 1       | 28        | 50.0%         | 3.24 [0.37, 28.32]               |
| Kendall et al. 2018                                                                                    | 1         | 13        | 1       | 11        | 28.0%         | 0.83 [0.05, 15.09]               |
| <b>Total (95% CI)</b>                                                                                  |           | <b>86</b> |         | <b>56</b> | <b>100.0%</b> | <b>2.21 [0.48, 10.22]</b>        |
| Heterogeneity: $\text{Tau}^2 = 0$ ; $\text{Chi}^2 = 0.60$ , $\text{df} = 2$ ( $P = .74$ ); $I^2 = 0\%$ |           |           |         |           |               |                                  |
| Test for overall effect: $Z = 1.01$ ( $P = .31$ )                                                      |           |           |         |           |               |                                  |

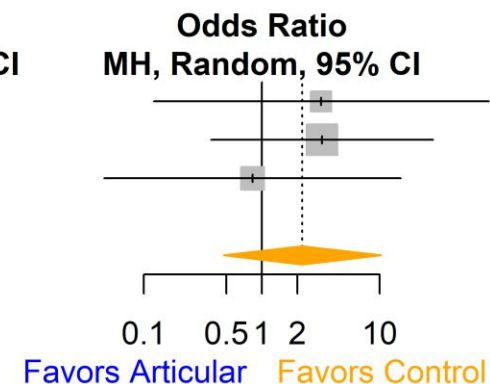

Supplementary Figure 7A.

| Study                                                                                                         | Any OMT |            | Control |           | Weight        | Odds Ratio<br>MH, Random, 95% CI |
|---------------------------------------------------------------------------------------------------------------|---------|------------|---------|-----------|---------------|----------------------------------|
|                                                                                                               | Events  | Total      | Events  | Total     |               |                                  |
| Reid et al. 2008                                                                                              | 1       | 17         | 0       | 17        | 12.1%         | 3.18 [0.12, 83.76]               |
| Sun et al. 2014                                                                                               | 0       | 16         | 1       | 11        | 12.0%         | 0.21 [0.01, 5.71]                |
| Reid et al. 2015                                                                                              | 6       | 56         | 1       | 28        | 18.4%         | 3.24 [0.37, 28.32]               |
| Papa et al. 2017                                                                                              | 1       | 19         | 8       | 12        | 17.2%         | 0.03 [0.00, 0.29]                |
| Kendall et al. 2018                                                                                           | 1       | 13         | 1       | 11        | 13.9%         | 0.83 [0.05, 15.09]               |
| Fraix et al. 2021 (a)                                                                                         | 1       | 6          | 2       | 5         | 14.5%         | 0.30 [0.02, 4.91]                |
| Fraix et al. 2021 (b)                                                                                         | 0       | 6          | 2       | 5         | 11.9%         | 0.11 [0.00, 2.93]                |
| <b>Total (95% CI)</b>                                                                                         |         | <b>133</b> |         | <b>89</b> | <b>100.0%</b> | <b>0.40 [0.09, 1.71]</b>         |
| Heterogeneity: $\text{Tau}^2 = 1.7326$ ; $\text{Chi}^2 = 11.13$ , $\text{df} = 6$ ( $P = .08$ ); $I^2 = 46\%$ |         |            |         |           |               |                                  |
| Test for overall effect: $Z = -1.24$ ( $P = .22$ )                                                            |         |            |         |           |               |                                  |

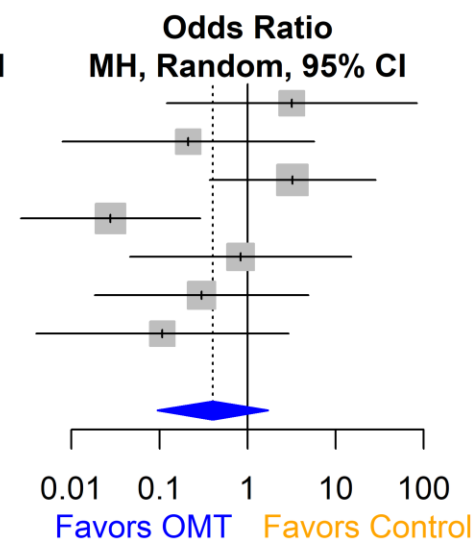

Supplementary Figure 7B.

| Study                                                                                                  | OMT    |           | Nonpharmacological Intervention |           | Weight        | Odds Ratio<br>MH, Random, 95% CI |
|--------------------------------------------------------------------------------------------------------|--------|-----------|---------------------------------|-----------|---------------|----------------------------------|
|                                                                                                        | Events | Total     | Events                          | Total     |               |                                  |
| DiFrancisco-Donoghue et al. 2016                                                                       | 1      | 6         | 1                               | 5         | 55.3%         | 0.80 [0.04, 17.20]               |
| Fraix et al. 2021 (a)                                                                                  | 1      | 6         | 0                               | 5         | 44.7%         | 3.00 [0.10, 90.96]               |
| Fraix et al. 2021 (b)                                                                                  | 0      | 6         | 0                               | 5         | 0.0%          |                                  |
| <b>Total (95% CI)</b>                                                                                  |        | <b>18</b> |                                 | <b>15</b> | <b>100.0%</b> | <b>1.44 [0.15, 14.14]</b>        |
| Heterogeneity: $\text{Tau}^2 = 0$ ; $\text{Chi}^2 = 0.32$ , $\text{df} = 1$ ( $P = .57$ ); $I^2 = 0\%$ |        |           |                                 |           |               |                                  |
| Test for overall effect: $Z = 0.32$ ( $P = .75$ )                                                      |        |           |                                 |           |               |                                  |

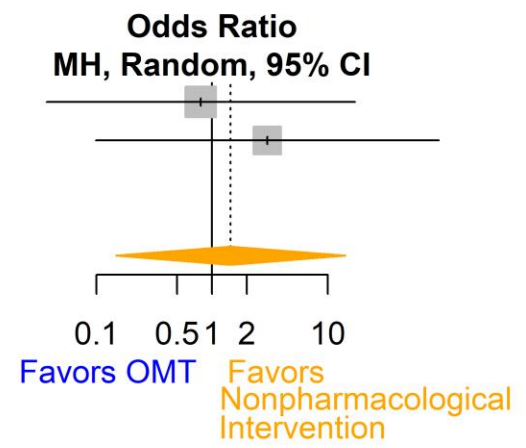

Supplementary Figure 7C.
